# Supplementary material
Source: Research Square preprint supplement (doi:10.21203/rs.3.rs-9564326/v1)
Supplement: Supplementary file 1 [file 3ba57728b093a2b5239ed2e3.docx]

**Comprehensive Spatiotemporal Water Quality Assessment in Industrially Polluted Digaru River of Assam, India: Multivariate Statistics, Water Quality Indexing, and Human Health Risks**

**K Zamminsion1*, Jasraj Kumawat2, Siddhant Dash3, Ajay Kalamdhad1,4**

1Centre for the Environment, Indian Institute of Technology Guwahati, Guwahati-781039, Assam, India

2Centre for Sustainable Technologies, Indian Institute of Science, Bengaluru-560012, Karnataka, India

3Department of Civil Engineering, SRM University, Guntur-522502, Andhra Pradesh, India

4Department of Civil Engineering, Indian Institute of Technology Guwahati, Guwahati-781039, Assam, India

*Corresponding Author: [k.zamminsion@iitg.ac.in](mailto:k.zamminsion@iitg.ac.in)

**Supplementary:**

| Station Name | Longitude | Latitude | Description of Station |
| --- | --- | --- | --- |
| L1 | 91.827024 | 26.014107 | Control point |
| L2 | 91.851504 | 26.026856 | Uppermost point of BIC |
| L3 | 91.87683126 | 26.04167083 | Nearby Byrnihat bridge (BIC) |
| L4 | 91.874092 | 26.041318 | Tributary of Digaru from the southeast |
| L5 | 91.888459 | 26.057785 | Lowermost industrial point (BIC) |
| L6 | 91.89771898 | 26.0616254 | 500m downstream from BIC |
| L7 | 91.935877 | 26.076989 | 6.3Km from L6 | Agricultural fields |
| L8 | 91.97826352 | 26.12132518 | Sonapur market | Sewage inflow |
| L9 | 91.993726 | 26.158884 | Agricultural fields | villages |
| L10 | 91.992803 | 26.187566 | Besides several brick kilns |
| L11 | 91.960334 | 26.225013 | Converge point with the Kopili River |
| L12 | 91.95786366 | 26.24425056 | Converge point with Brahmaputra |

**Table S1: Geocoordinates and description details of the sampling stations**

**Table S2: Descriptive statistics of all physicochemical parameters within the study area**

| Parameters  (µg/L) | Max | Min | Average | Stdev | Skewness | Kurtosis | Permissible limits (BIS, 2012) /WHO, 2011 |
| --- | --- | --- | --- | --- | --- | --- | --- |
| **DO** | 8.95 | 5.40 | 7.42 | 0.78 | -0.55 | -0.55 | - |
| **pH** | 7.46 | 4.82 | 6.55 | 0.38 | -0.52 | 2.46 | 6.5-8.5 |
| **EC** | 156.25 | 41.69 | 71.69 | 19.51 | 1.11 | 1.90 | 1500 |
| **Turbidity** | 502.00 | 2.70 | 76.56 | 104.45 | 2.43 | 6.03 | 5 |
| **TA** | 56.89 | 20.56 | 35.55 | 8.88 | 0.27 | -1.11 | 200 |
| **TH** | 77.45 | 11.19 | 44.74 | 16.68 | -0.21 | -0.70 | 200 |
| **BOD5** | 47.00 | 5.10 | 19.90 | 8.83 | 0.62 | 0.21 | 0 |
| **TDS** | 95.30 | 13.61 | 40.09 | 19.79 | 0.86 | -0.20 | 500 |
| **F-** | 1.00 | 0.03 | 0.37 | 0.26 | 0.44 | -1.16 | 1 |
| **Cl-** | 11.42 | 0.61 | 4.08 | 1.79 | 0.96 | 2.75 | 250 |
| **NO32-** | 55.91 | 0.31 | 11.07 | 10.71 | 1.79 | 3.20 | 45 |
| **PO43-** | 0.41 | 0.01 | 0.16 | 0.10 | 0.39 | -0.60 | 0.1 |
| **SO42-** | 27.30 | 0.35 | 5.69 | 4.87 | 2.10 | 5.38 | 200 |
| **COD** | 290.00 | 11.99 | 111.84 | 85.02 | 0.63 | -0.97 | 25 |

**Table S3: Descriptive statistics of all metals within the study area**

| **Metals**  **(**µg/L) | **Max** | **Min** | **Average** | **Stdev** | **Skewness** | **Kurtosis** | **Permissible limits (BIS, 2012)** |
| --- | --- | --- | --- | --- | --- | --- | --- |
| Na | 8377.32 | 632.89 | 4221.22 | 2529.47 | -0.04 | -1.37 | - |
| Mg | 2842.07 | 524.1 | 1381.92 | 509.68 | 0.83 | 1.21 | 30,000 |
| **Al** | **2497.92** | 18.12 | **523.33** | **483.74** | 2.17 | 5.71 | 200 |
| K | 5923.44 | 1895.01 | 3078.53 | 936.48 | 1.56 | 2.53 | - |
| Ca | 3819.64 | 751.58 | 1748.71 | 677.63 | 0.92 | 0.63 | 200,000 |
| Cr | 8.92 | 0.03 | 2.54 | 1.81 | 1.25 | 2.10 | 50 |
| **Mn** | **321.82** | 5.44 | 87.11 | 62.06 | 2.13 | 5.06 | 300 |
| **Fe** | **3938.7** | 80.36 | **1262.05** | **636.17** | 2.29 | 7.65 | 300 |
| Co | 7.8 | 0.003 | 0.7 | 1.20 | 4.79 | 27.08 | - |
| Ni | 9.21 | 0.12 | 2.93 | 2.27 | 1.04 | 0.63 | 20 |
| Cu | 116.44 | 0.03 | 27.14 | 28.17 | 1.63 | 2.11 | 1500 |
| Zn | 369.98 | 12.62 | 104.0 | 62.33 | 1.81 | 5.90 | 5000 |
| Sr | 40.31 | 12.37 | 23.11 | 5.63 | 0.96 | 1.14 | - |
| Ba | 58.59 | 0.01 | 24.12 | 14.79 | 0.39 | -0.41 | 700 |
| **Pb** | **68.43** | 0.9 | **23.74** | **15.54** | 1.02 | 0.55 | 10 |

**
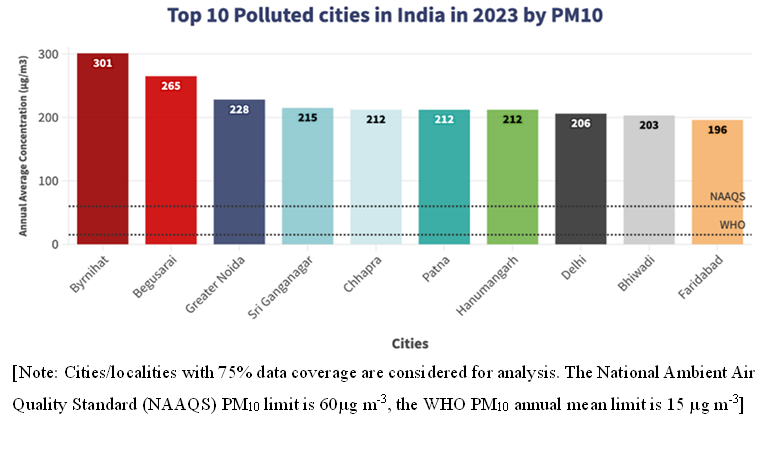
Fig S1:** Top 10 Polluted cities in India 2023 by PM10 according to the CPCB’s National Ambient Air Quality Standard (NAAQS) report 2024 (CREA, 2024)

**Table S4:** **Health risk assessment factors including reference values for HHRA**

Table S4.1 denotes the general indices used for estimation of CDI for adults and children via oral and dermal exposure routes:

| **Indices Notations** | **Adults** | **Children** | **Unit** | **References** |
| --- | --- | --- | --- | --- |
| Daily Ingestion rate (IR) | 2 | 0.64 | L/day | USEPA, (2004); (Nur et al., 2025); (Siddique et al., 2021) |
| Exposure frequency (EF) | 350 | 350 | days/year |
| Exposed skin area (SA) | 18000 | 6600 | cm2 |
| Exposure time per day (ET) | 0.58 | 1 | h/day |
| Exposure duration (ED) | 70 | 6 | years |
| Body weight (BW) | 70 | 15 | kg |
| Average time for non-carcinogens (AT) | 25550 | 2190 | days |

Table S4.2 denotes the oral (gastrointestinal) absorption factors and dermal permeability coefficient for all the potentially toxic metals found within the study area:

| **Potentially Toxic Elements** | **Gastrointestinal absorption factor (Absg in %)** | **Dermal permeability coefficient (Kp in cm/h)** | **References** |
| --- | --- | --- | --- |
| Mn | 6 | 1.00×10-3 | (USEPA, 2004); (Nur et al., 2025); (Siddique et al., 2021) |
| Cr | 3.8 | 3.00×10-3 |
| Pb | 11.7 | 1.00×10-3 |
| Fe | 1.4 | 1.00×10-3 |
| Co | 20 | 4.00×10-3 |
| Ni | 4 | 4.00×10-3 |
| Cu | 57 | 1.00×10-3 |
| Zn | 20 | 6.00×10-4 |

Table S4.3 denotes the reference doses of each potentially toxic metals considered for each exposure routes, for estimation of the Hazard Quotient (HQ):

| **Potentially Toxic Elements** | **RfDoral** | **RfDdermal** | **Oral cancer slope factor (SF) (µg/kg/day)-1** | | **References** |
| --- | --- | --- | --- | --- | --- |
|  | **(µg kg-1 day-1)** | **(µg kg-1 day-1)** | **Ingestion** | **Dermal** |  |
| Cr | 3 | 0.075 | 0.0005 | NA | (USEPA, 2011); (Siddique et al., 2021); (Nur et al., 2025) |
| Mn | 24 | 0.96 | NA | NA |
| Fe | 700 | 140 | NA | NA |
| Co | 0.3 | 0.06 | NA | NA |
| Ni | 20 | 0.8 | 0.00091 | NA |
| Cu | 40 | 12 | NA | NA |
| Zn | 300 | 60 | NA | NA |
| Pb | 1.4 | 0.42 | 0.0085 | NA |

**Fig S2: Eight-point Calibration details of all the metals considered within the study.**

| 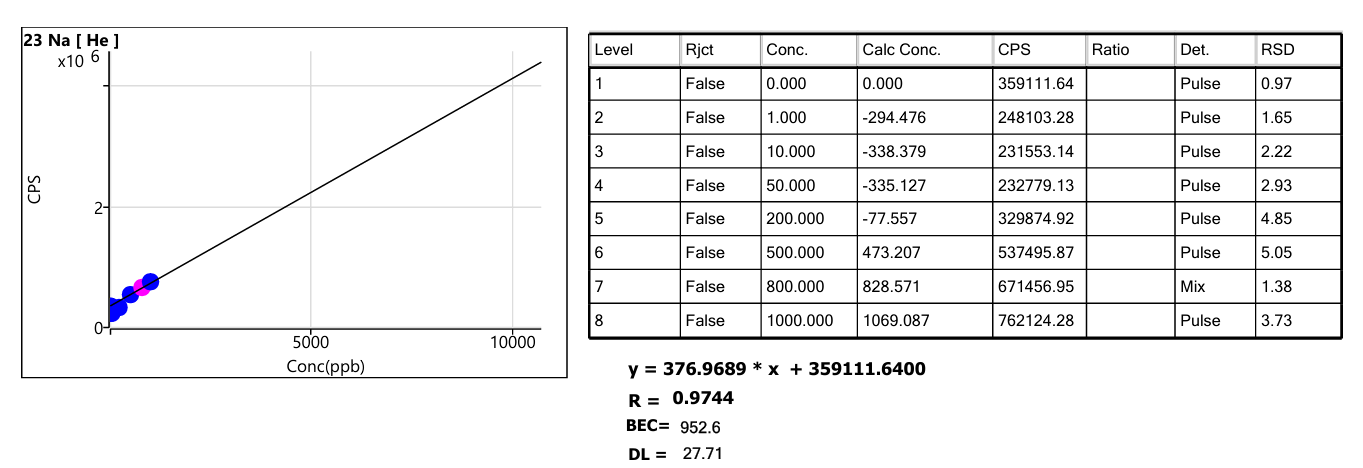 |
| --- |
| 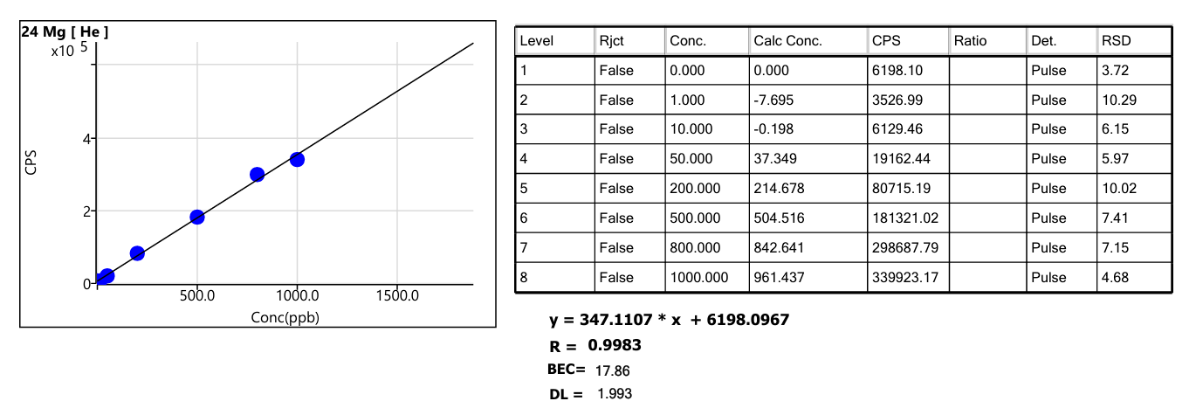 |
| 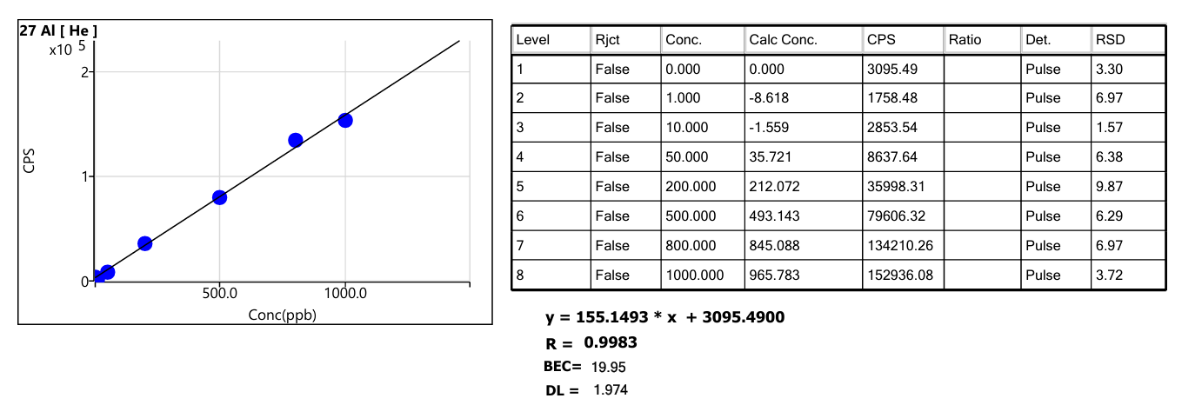 |
| 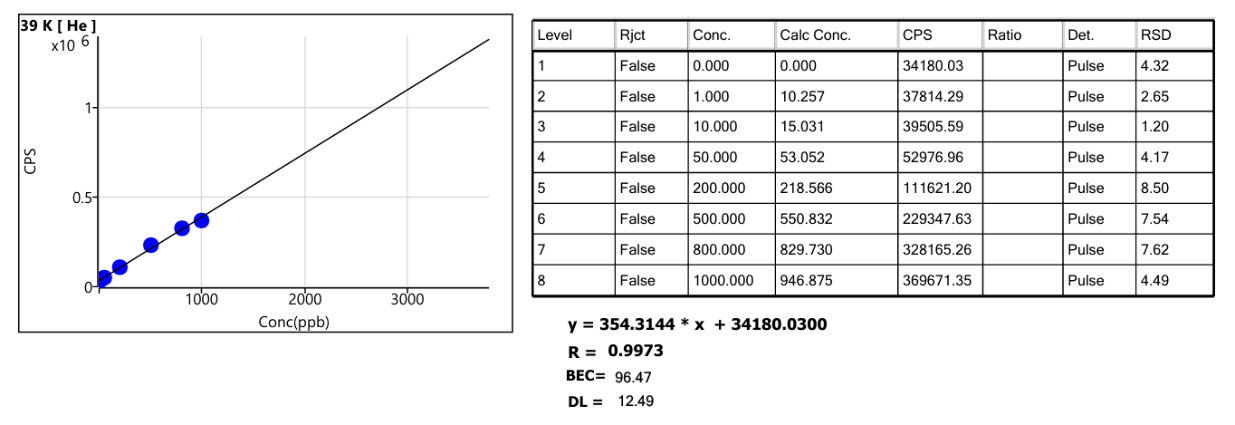 |
| 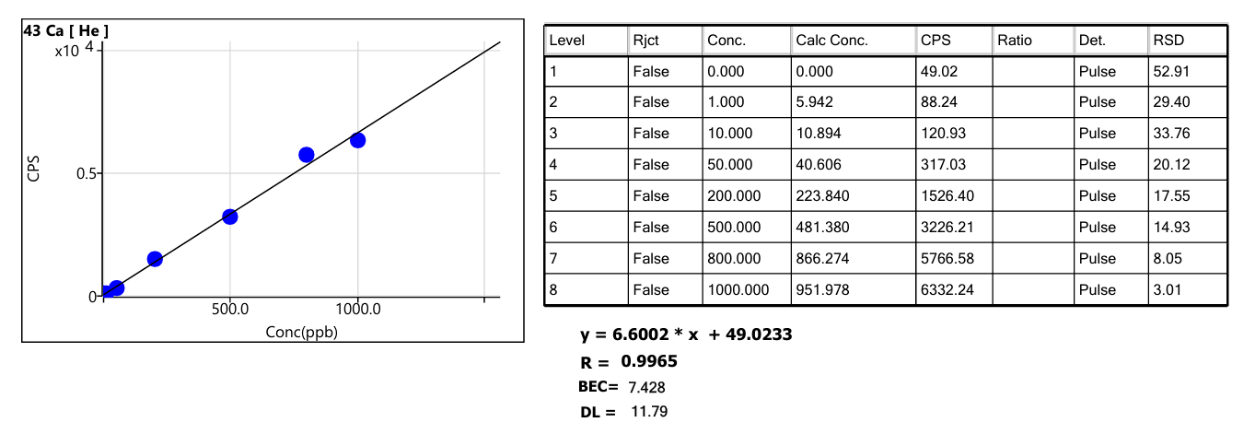 |
| 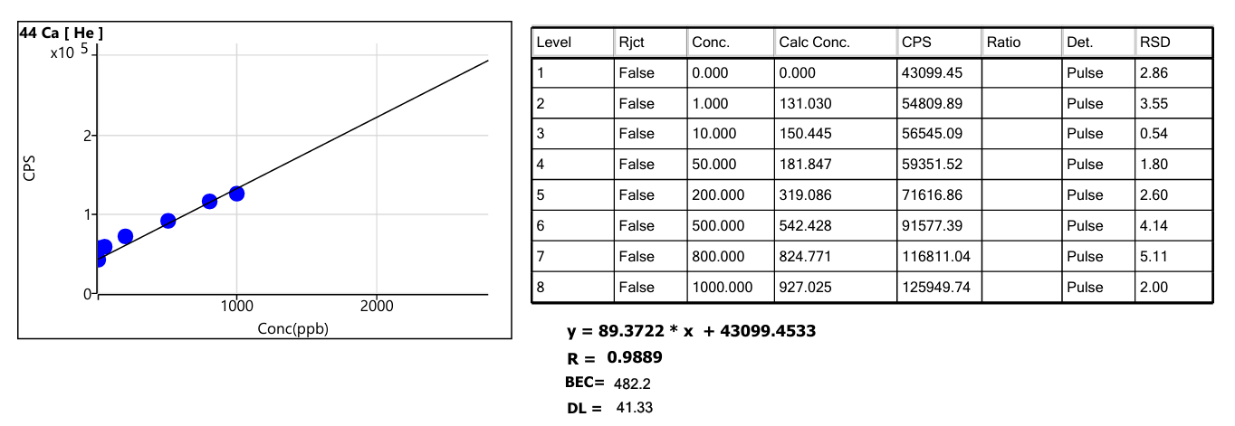 |
| 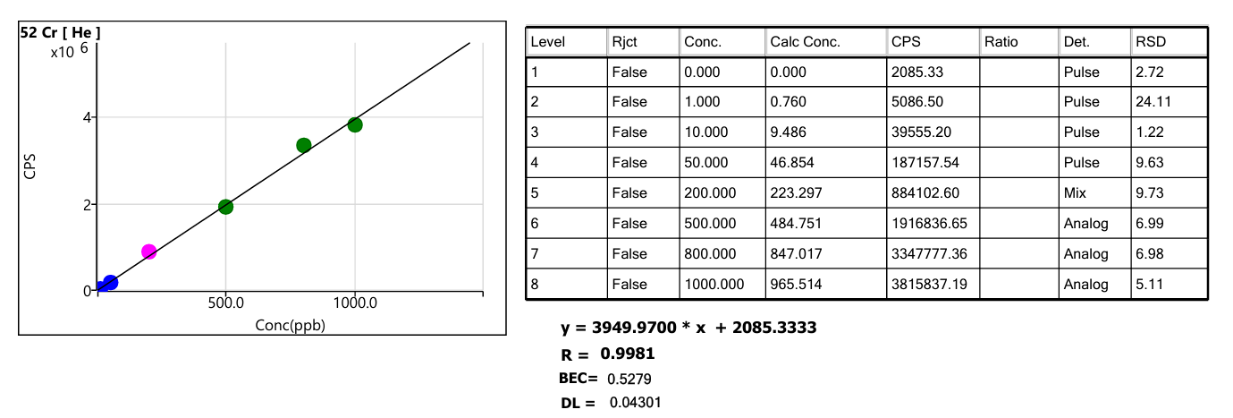 |
| 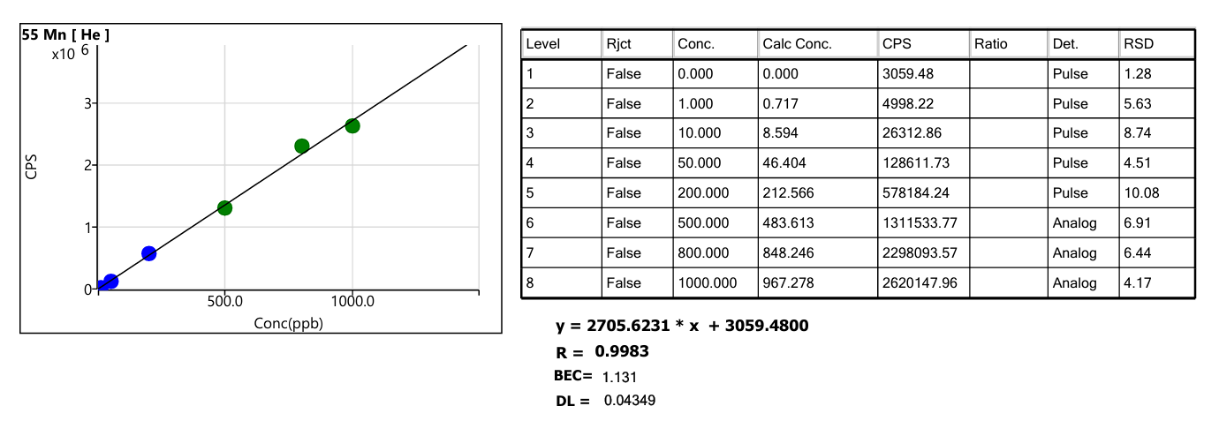 |
| 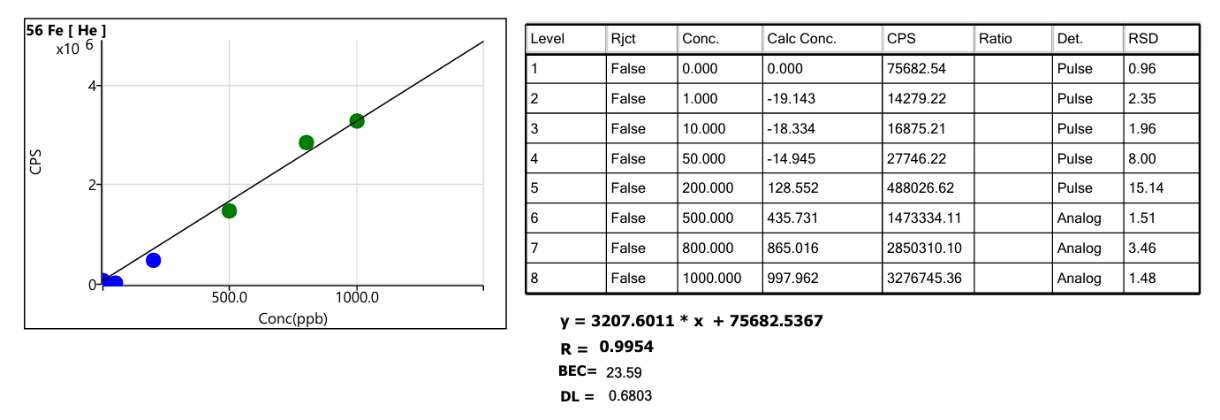 |
| 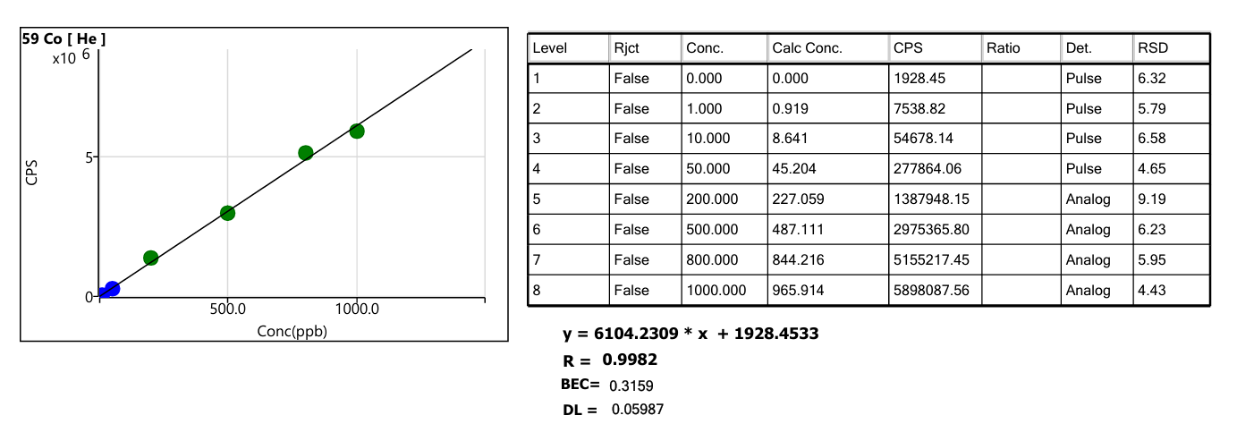 |
| 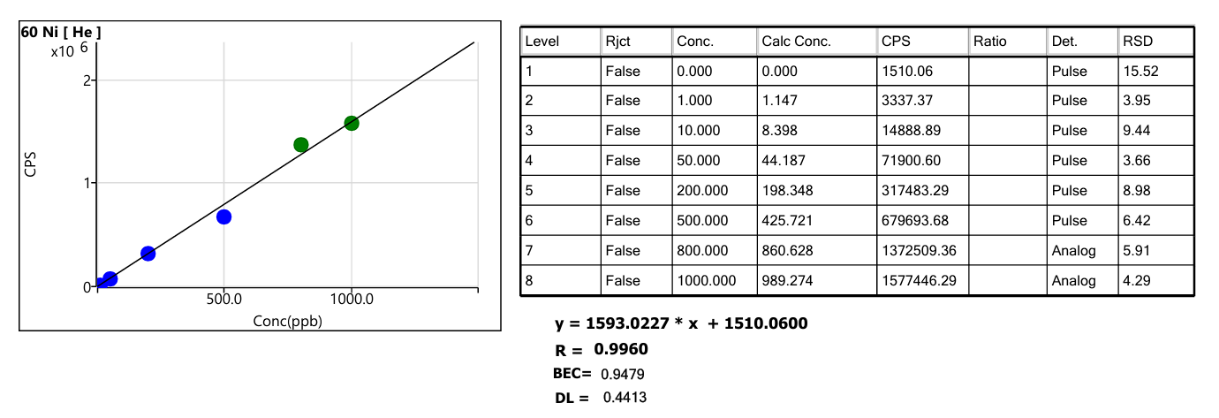 |
| 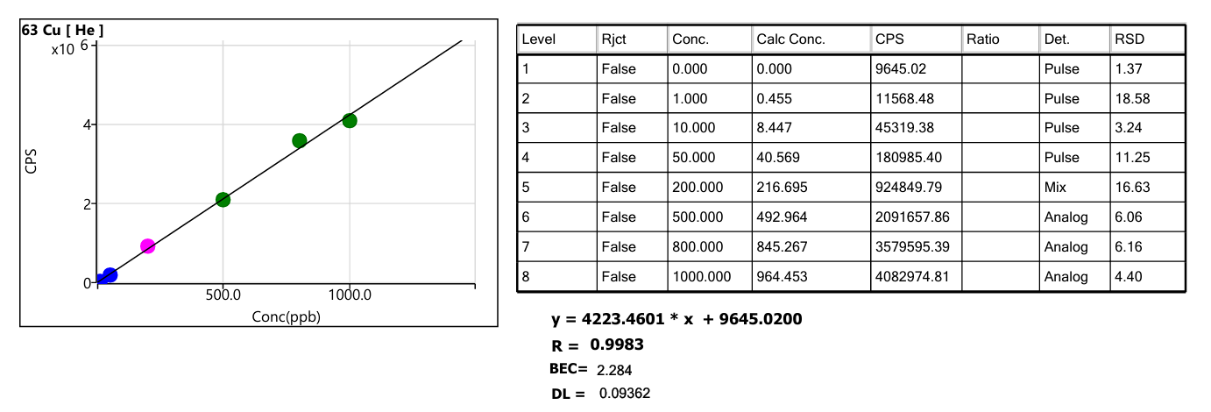 |
| 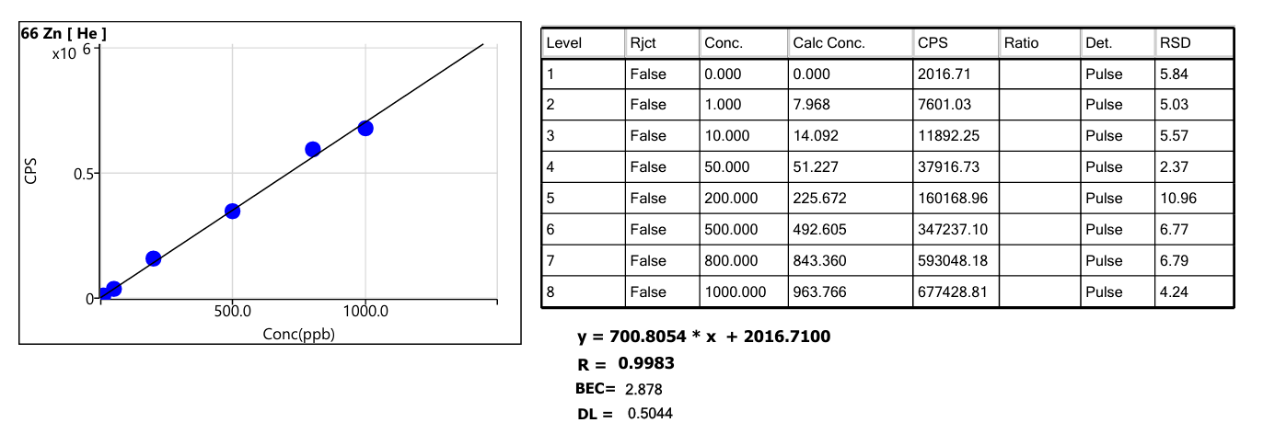 |
| 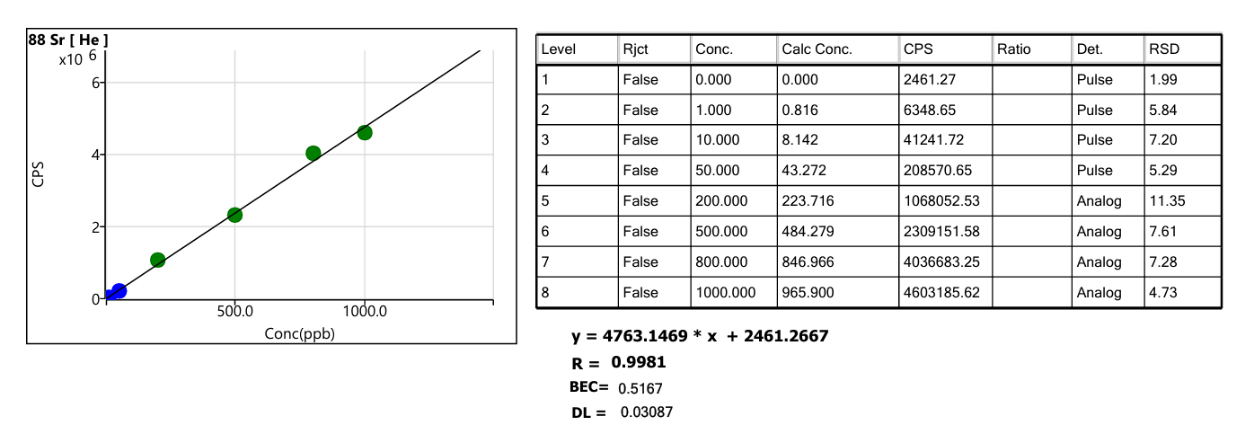 |
| 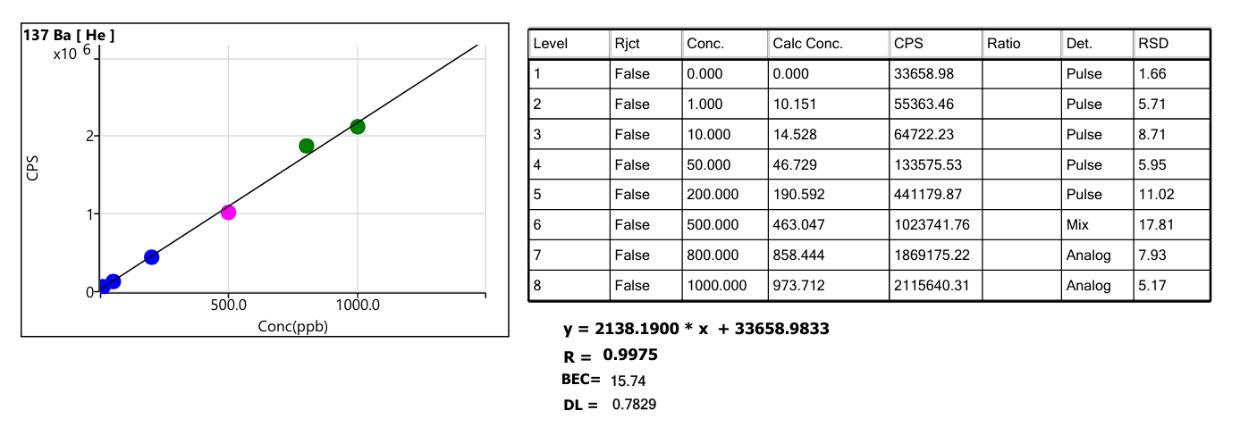 |
| 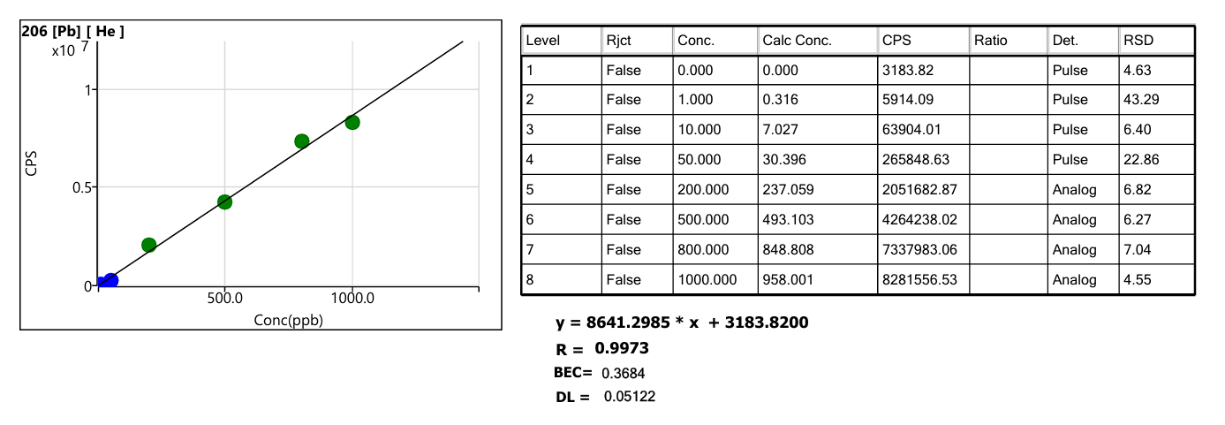 |
| 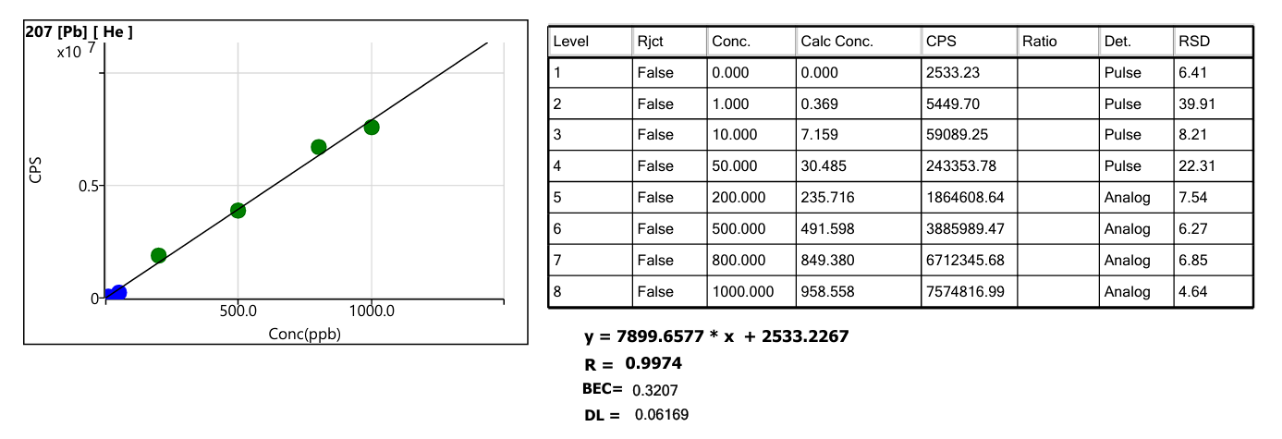 |
| 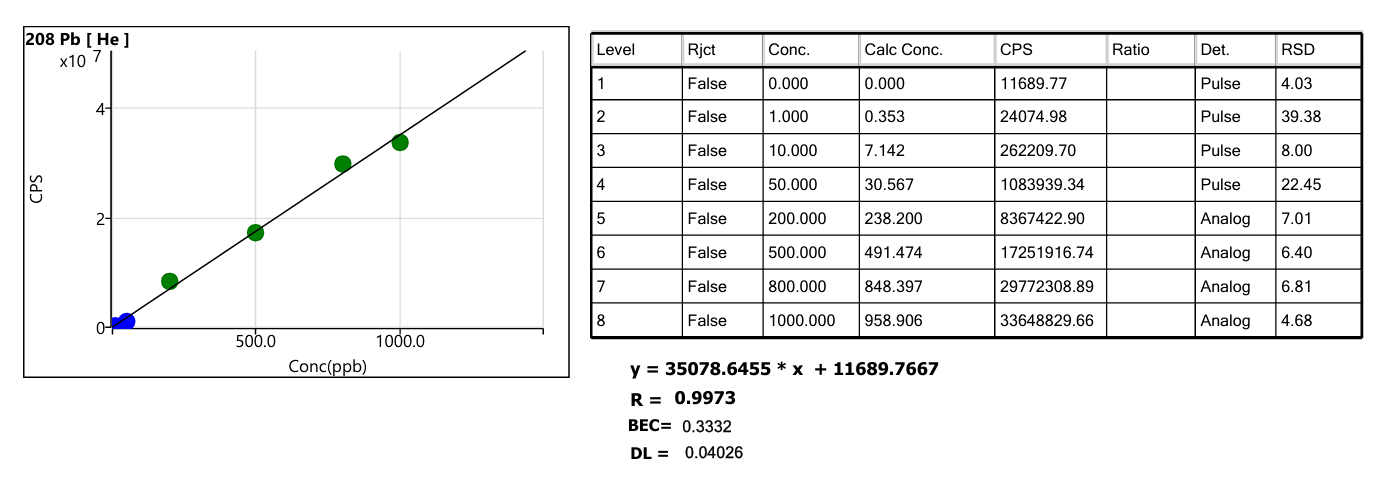 |

**Abbreviation**

APHA American Public Health Association

BIC Byrnihat Industrial Clusters

BOD5 5-day Biochemical Oxygen Demand

CDI Chronic Daily Intake

COD Chemical Oxygen Demand

DO Dissolved Oxygen

EC Electrical Conductivity

HDPE High-Density Polyethylene

HCA Hierarchical Cluster Analysis

HQ Hazard Quotient

IC Ion Chromatography

MEWQI Modified Entropy-weight Water Quality Index

MPN Most Probable Number

PCBA Pollution Control Board of Assam

PCA Principal Component Analysis

TA Total Alkalinity

TH Total Hardness

WHO World Health Organisation

WQI Water Quality Index

**References:**

CREA. (2024). *37 NCAP cities meet annual pollution targets but 118 new cities record hazardous pollution levels in 2023* (Issue January). www.energyandcleanair.org

Nur, T., Begum, S., Alam, N. E., Shahidur, M., Khan, R., Ferdous, F., & Kabir, A. (2025). Comprehensive analysis and human health risk assessment of tap water quality in Dhaka City , Bangladesh : Integrating source identification , index-based evaluation , and heavy metal assessment. *Journal of Hazardous Materials*, *485*(December 2024), 136837. https://doi.org/10.1016/j.jhazmat.2024.136837

Siddiquee, M.S.H., Ahamed, R., 2020. Exploring water consumption in Dhaka

City using instrumental variables regression approaches. Environ Process 7 (4), 1255–1275. https://doi.org/10.1007/s40710-020-00462-3.

City using instrumental variables regression approaches. Environ Process 7 (4), 1255–1275. https://doi.org/10.1007/s40710-020-00462-3.

WHO (2011) Guidelines for drinking-water quality, 4th edn. WHO, Geneva

Zakir, H. M., Sharmin, S., Akter, A., & Rahman, S. (2020). Assessment of health risk of heavy metals and water quality indices for irrigation and drinking suitability of waters : a case study of Jamalpur Sadar area , Bangladesh. *Environmental Advances*, *2*(September), 100005. https://doi.org/10.1016/j.envadv.2020.100005
